# Supplementary material
Source: PubMed Central journal article supplement (PMC4817623)
Supplement: ismej201576x2.pdf [file ismej201576x2.pdf]

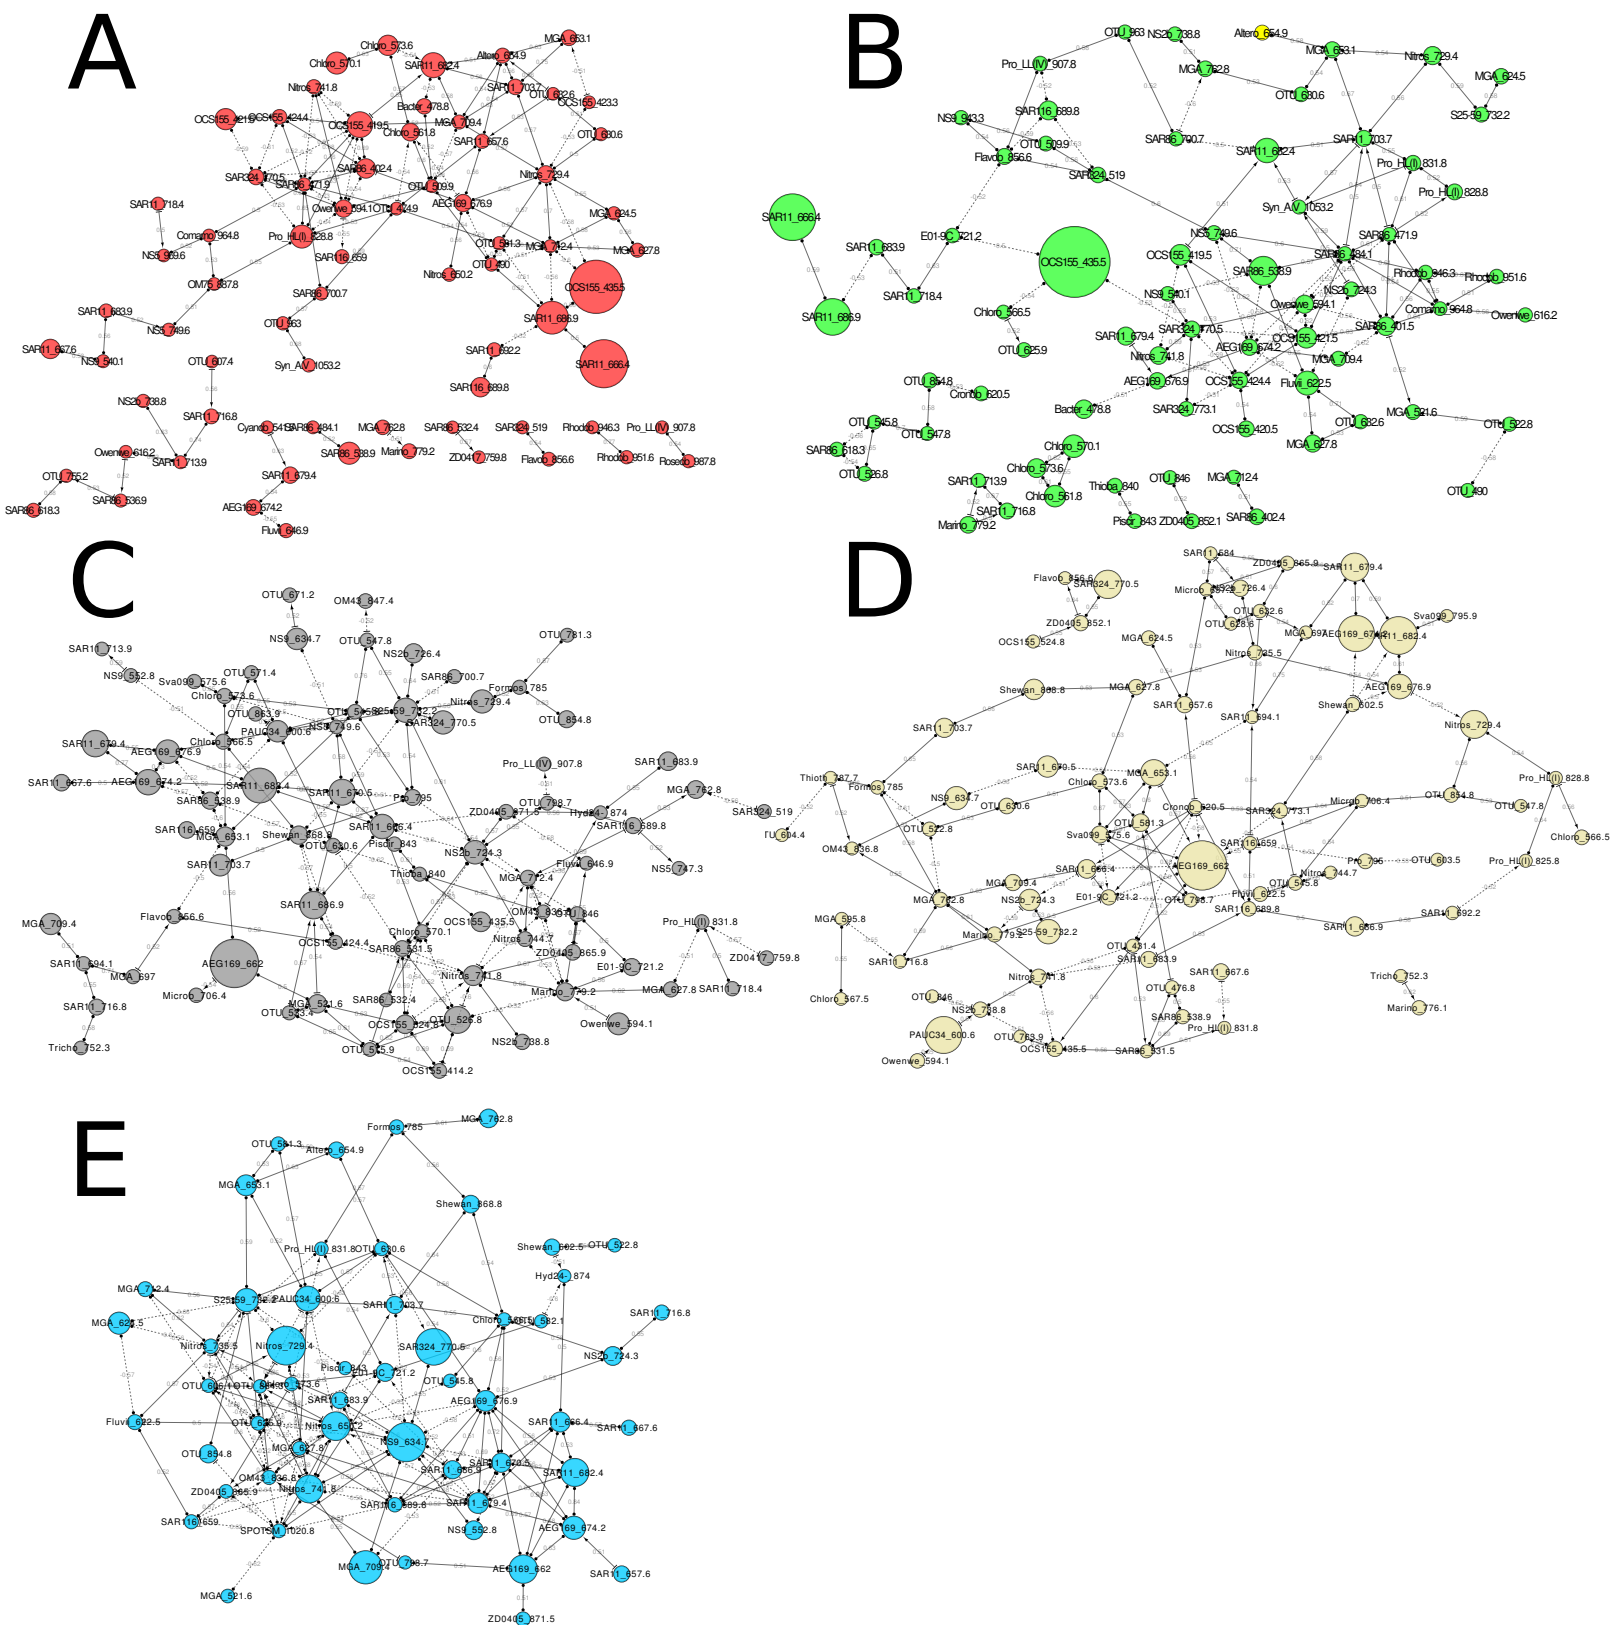

Figure S1. Association network showing statistically significant, positive and negative time lagged and non time-lagged correlations between bacterial nodes within each depth (A, 5m; B, DCM; C, 150m; D, 500m; E, 890m). Nodes represent bacterial OTUs (circles) at each depth. Edges (lines) represent correlations, sometimes time lagged, between the bacterial OTUs. Shown are bacteria that occur at least 25 times and edges that have lagged Spearman correlations such that  $|R| > 0.55$ ,  $P < 0.01$ ,  $Q < 0.05$ . Solid edges represent positive correlations, dashed edges represent negative correlations. Arrows indicate time lagged associations. Node identities are indicated in Table 3 and there is a legend in Figure 3.

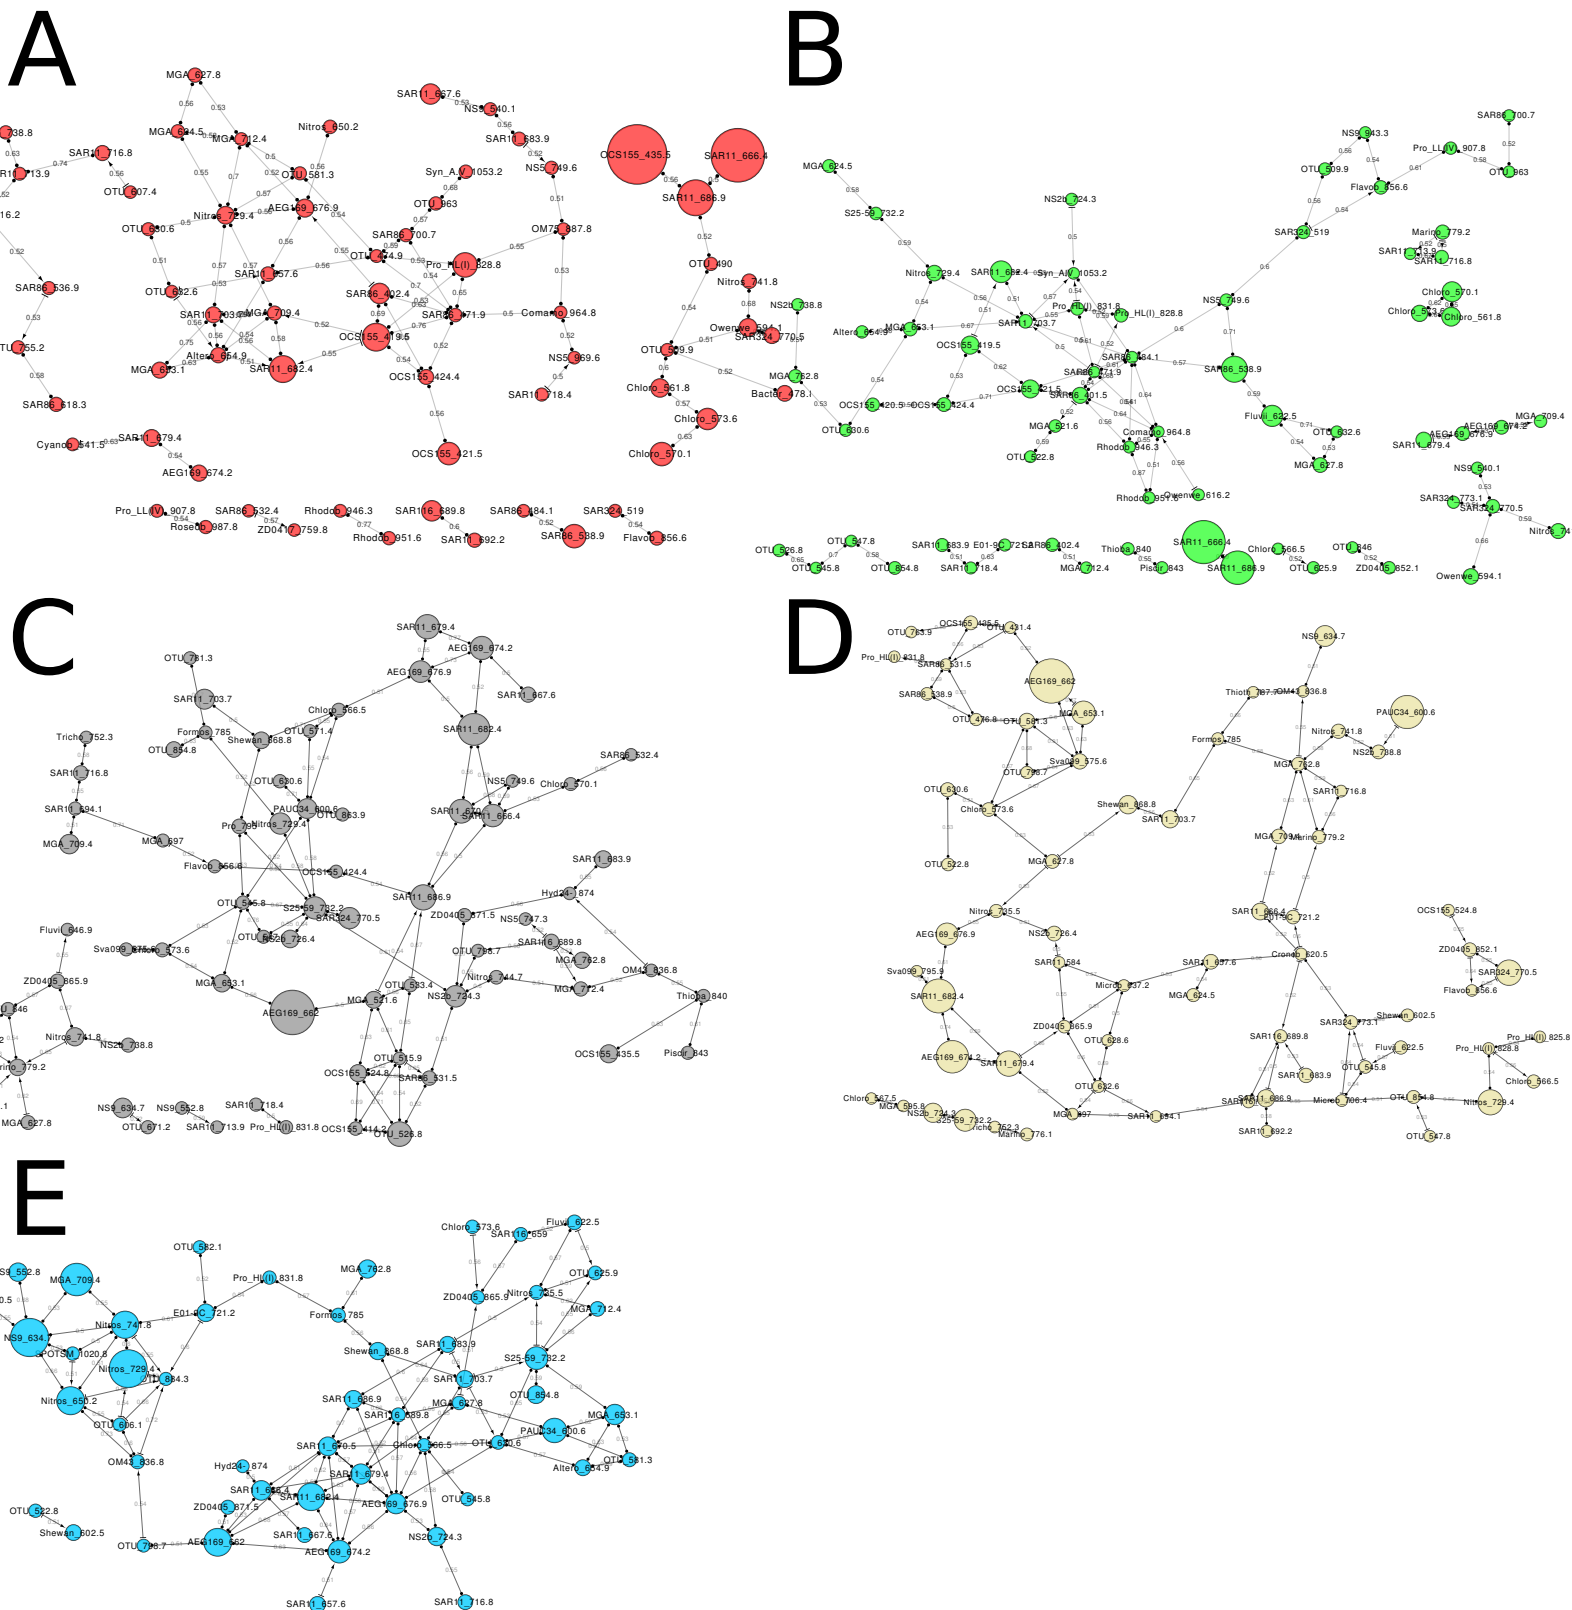

Figure S2. Association network showing statistically significant, positive time lagged and non time-lagged correlations between bacterial nodes within each depth (A, 5m; B, DCM; C, 150m; D, 500m; E, 890m). Nodes and edges are as in Figure S1, though only positive associations also present.

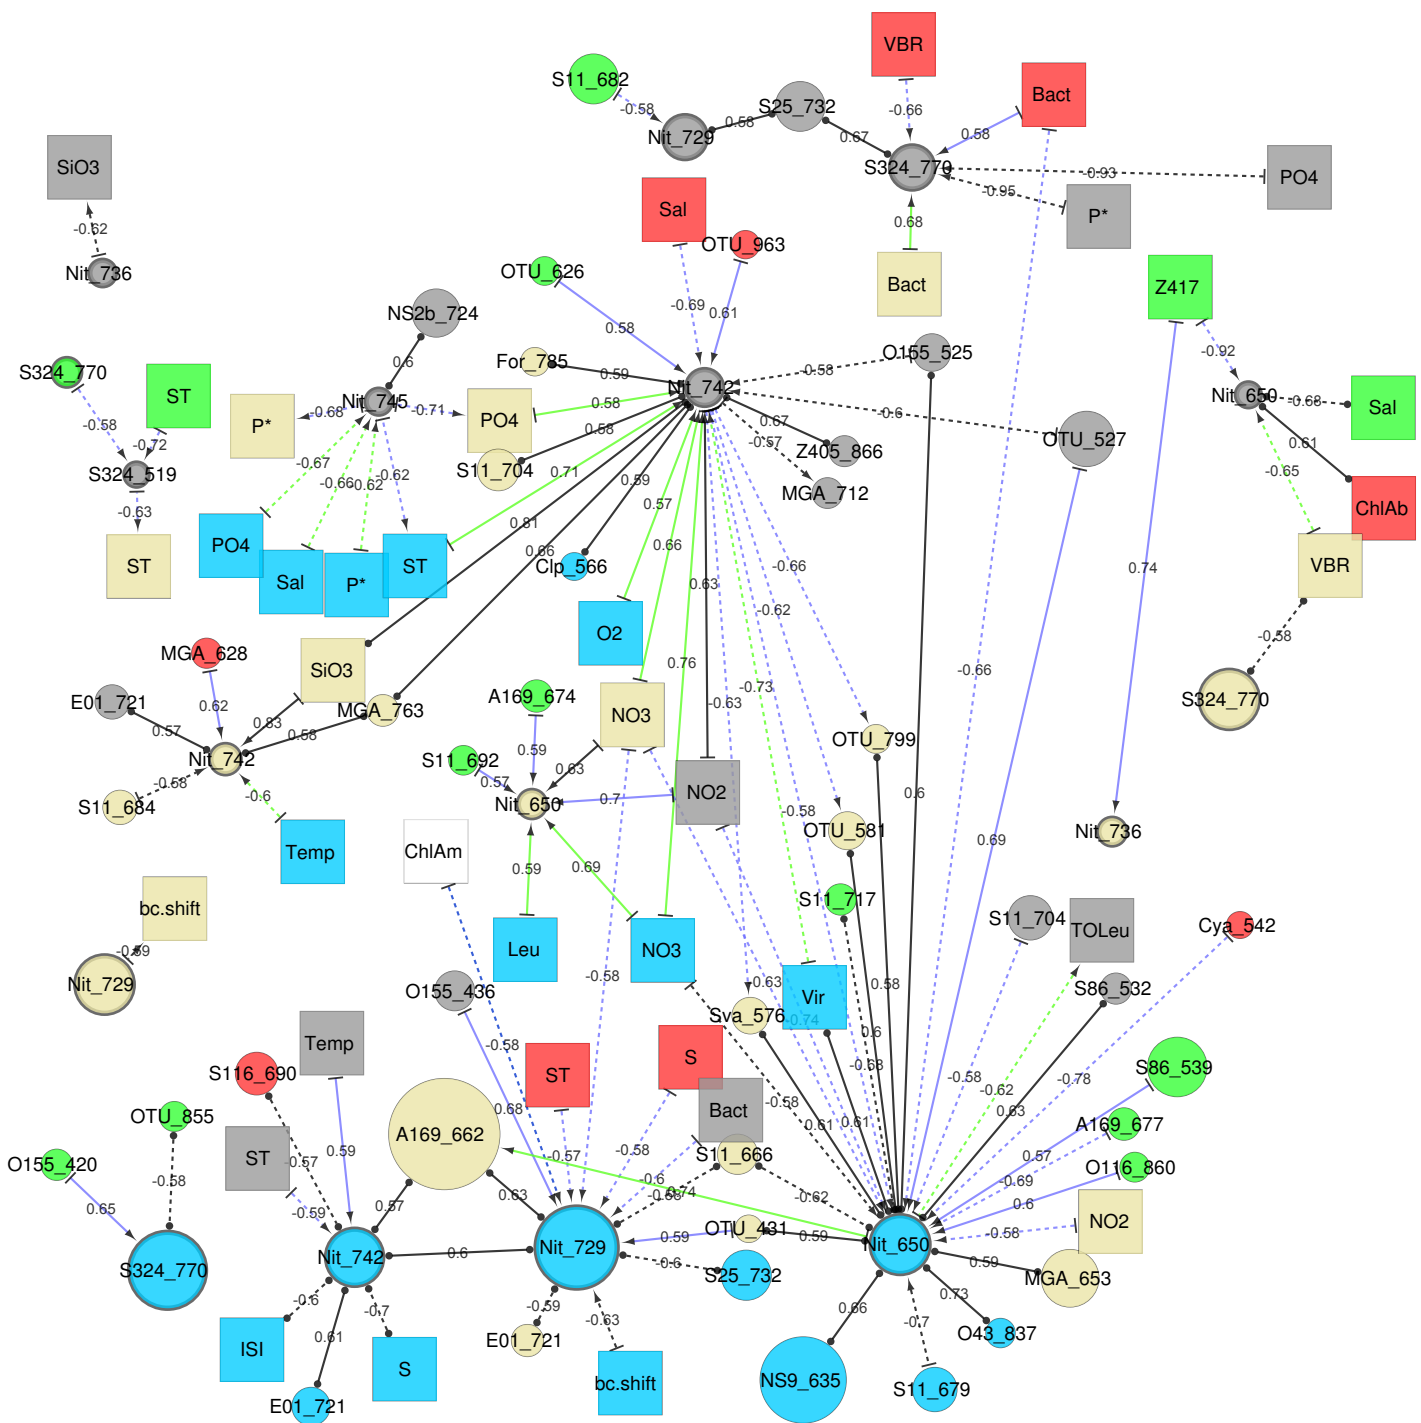

Figure S3. Association network of correlations between Deltaproteobacteria OTUs at 150, 500 and 890m and other bacteria and environmental parameters found at every depth throughout the water column. All bacteria shown have a mean abundance of greater than 1% and are found with a relative abundance of greater than 0.01% in more than 36 samples. Lines represent statistically significant, potentially time lagged correlations (Spearman  $|R| > 0.57$ ,  $P < 0.01$ ,  $Q < 0.05$ ). Nodes represent individual measurements of bacterial abundances (circles) or environmental parameters (squares). Abbreviated names are followed by OTU fragment size. Node Sizes of bacterial nodes represent the average abundance of OTUs. Solid lines show a positive correlation, dashed lines show a negative correlation, arrows indicate a 1-month shift in the correlation. Abbreviations for the nodes are translated in Table S1. Edge labels represent Spearman R values. Edge colors are the same as in Figure 2. Legends are present in Figures 2 and 3.

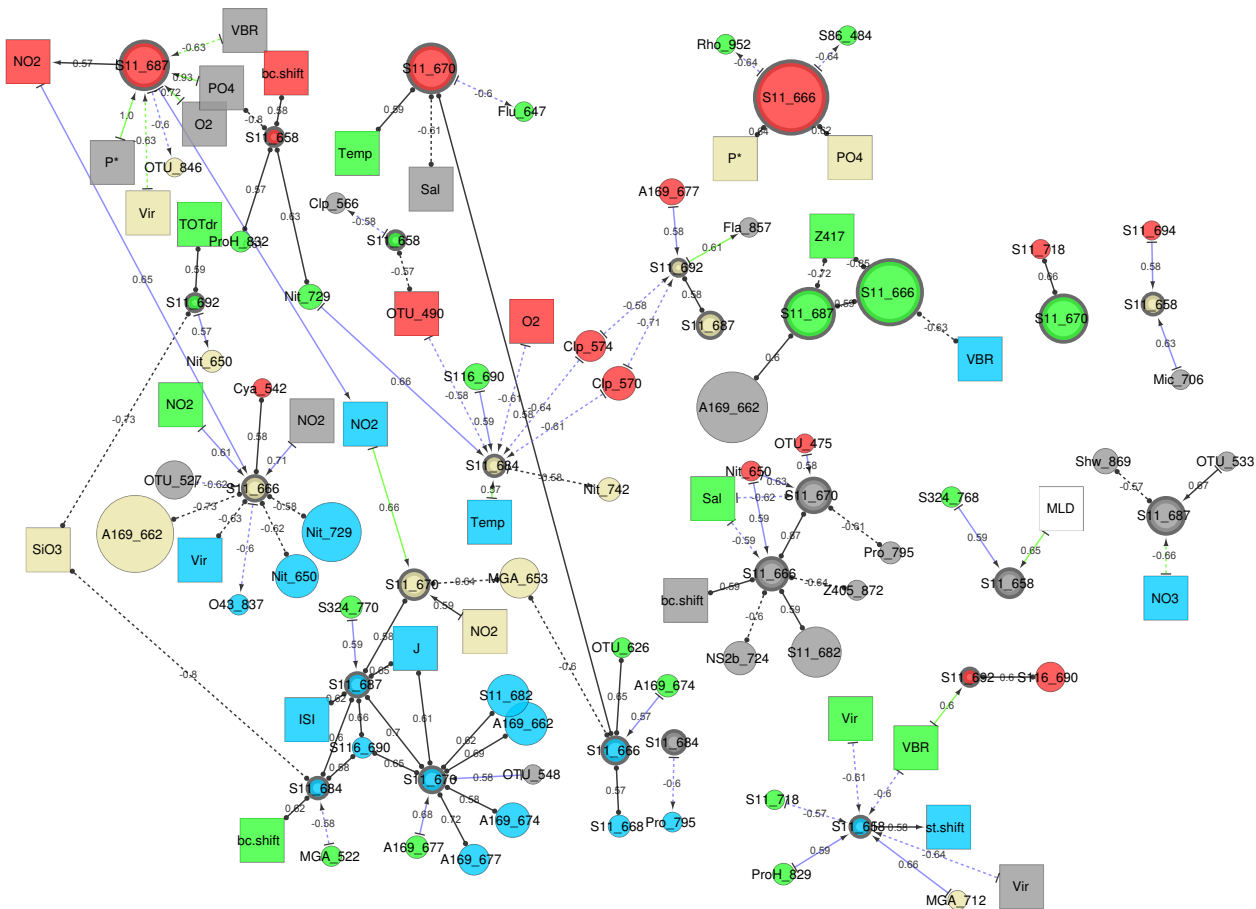

Figure S4. Association network of correlations between bacteria from the SAR11 Surface-1 clade and other bacteria and environmental parameters found at every depth throughout the water column. Nodes and edges have the same thresholds (P, Q, and R values for Edges, mean abundance and occurrence thresholds for bacterial nodes) as in Figure S3.

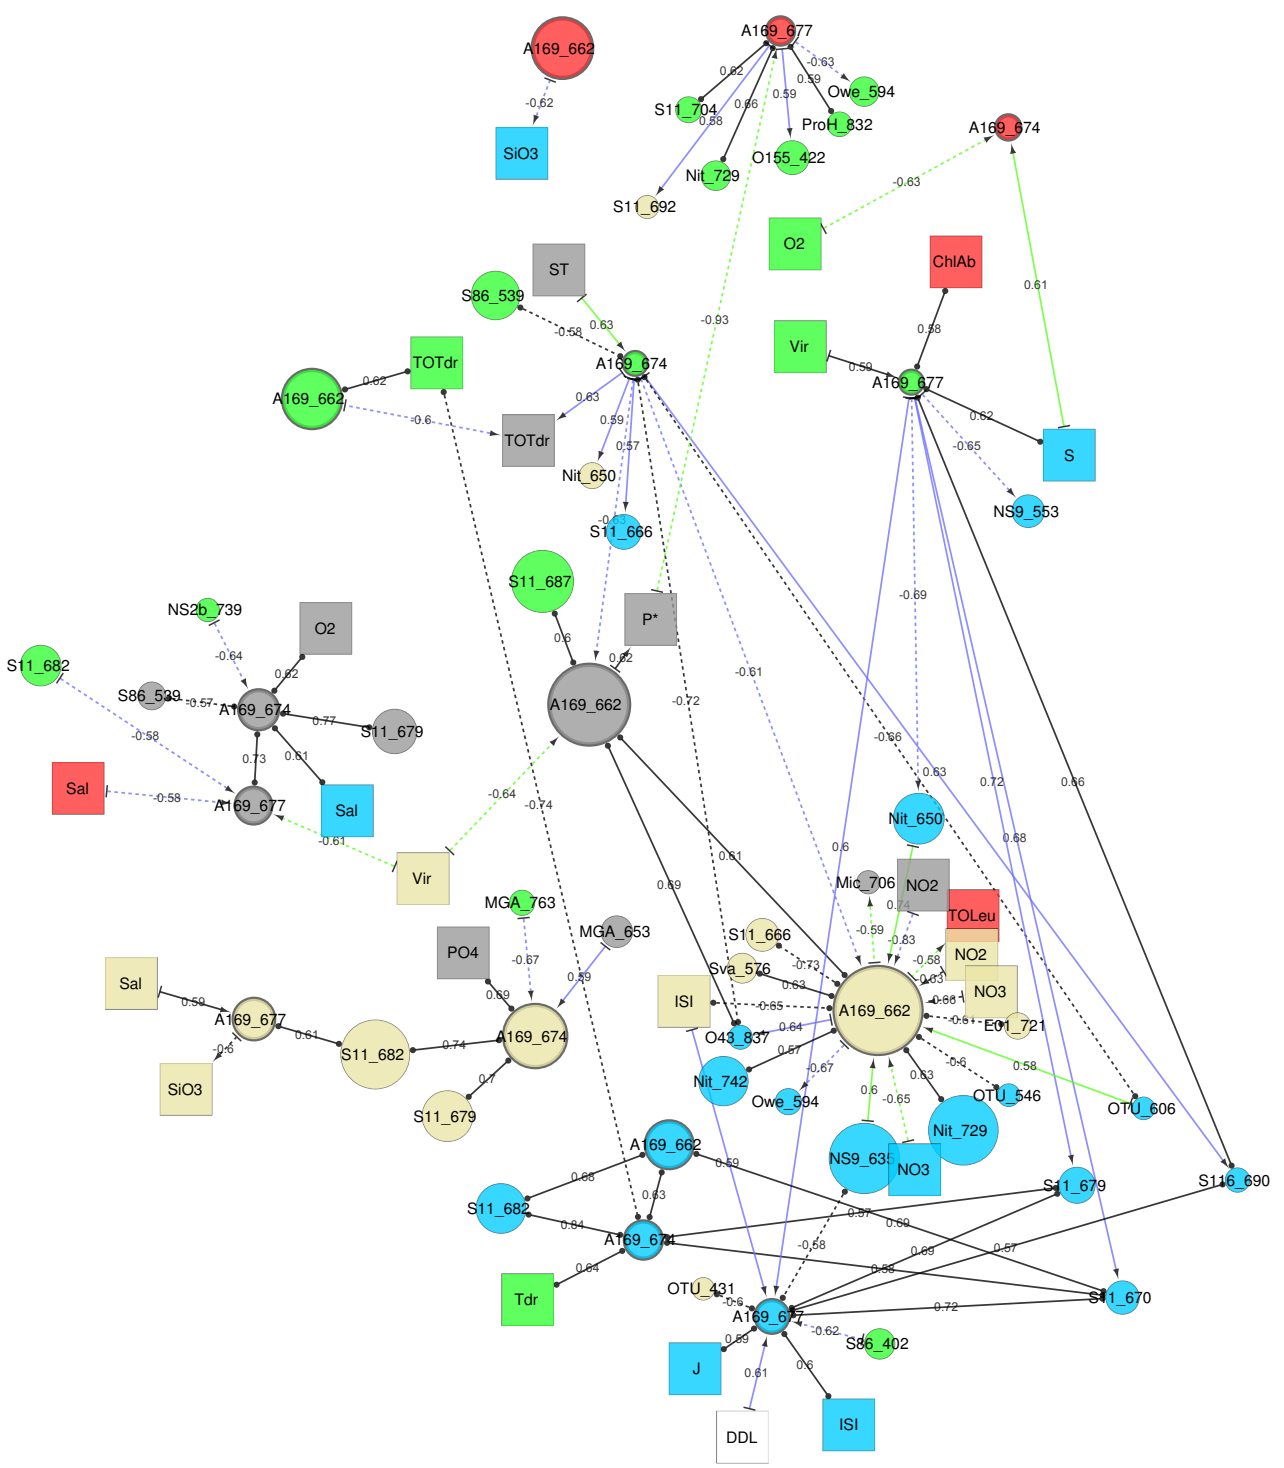

Figure S5. Association network of correlations between bacteria from the AEGEAN-169 clade and other bacteria and environmental parameters found at every depth throughout the water column. Nodes and edges have the same thresholds (P, Q, and R values for Edges, mean abundance and occurrence thresholds for bacterial nodes) as in Figure S3.

| <i>Code</i> | <i>Type</i> | <i>Parameter</i>                        | <i>Taxonomy Note</i> |
|-------------|-------------|-----------------------------------------|----------------------|
| A169        | ARISA       | AEGEAN-169                              | Alphaproteobacteria  |
| Bav         | ARISA       | Bacteriovoraceae                        | Deltaproteobacteria  |
| Clp         | ARISA       | Chloroplast                             | Chloroplast          |
| Clp         | ARISA       | Chloroplast                             | Chloroplast          |
| Com         | ARISA       | Comamonadaceae                          | Betaproteobacteria   |
| Cro         | ARISA       | Cronobacter                             | Gammaproteobacteria  |
| Cya         | ARISA       | Cyanobacteria                           | Cyanobacteria        |
| E01         | ARISA       | E01-9C-26                               | Gammaproteobacteria  |
| Fla         | ARISA       | Flavobacteriaceae                       | Flavobacteria        |
| Flu         | ARISA       | Fluviicola                              | Flavobacteria        |
| For         | ARISA       | Formosa                                 | Flavobacteria        |
| Hyd         | ARISA       | Hyd24-01                                | Gammaproteobacteria  |
| Mar         | ARISA       | Marinoscillum                           | Sphingobacteria      |
| Mic         | ARISA       | Microbacteriaceae                       | Actinobacteria       |
| Nit         | ARISA       | Nitrospina                              | Deltaproteobacteria  |
| NS2b        | ARISA       | NS2b                                    | Flavobacteria        |
| NS5         | ARISA       | NS5                                     | Flavobacteria        |
| NS9         | ARISA       | NS9                                     | Flavobacteria        |
| O116        | ARISA       | OCS116                                  | Alphaproteobacteria  |
| O155        | ARISA       | OCS155                                  | Actinobacteria       |
| O43         | ARISA       | OM43                                    | Betaproteobacteria   |
| O75         | ARISA       | OM75                                    | Alphaproteobacteria  |
| OTU         | ARISA       | Unidentified Operational Taxonomic Unit |                      |
| Owe         | ARISA       | Owenweeksia                             | Flavobacteria        |
| P34         | ARISA       | PAUC34f or Marine Group A               |                      |
| Pis         | ARISA       | Piscirickettsiaceae                     | Gammaproteobacteria  |
| Pro         | ARISA       | Prochlorococcus                         | Cyanobacteria        |
| SynAV       | ARISA       | Synechococcus A.V                       | Cyanobacteria        |
| ProH        | ARISA       | Prochlorococcus Low Light I             | Cyanobacteria        |
| ProL        | ARISA       | Prochlorococcus Low Light IV            | Cyanobacteria        |
| Rho         | ARISA       | Rhodobacteraceae                        | Alphaproteobacteria  |
| Ros         | ARISA       | Roseobacter                             | Alphaproteobacteria  |
| S25         | ARISA       | S25-593                                 | Alphaproteobacteria  |
| S11         | ARISA       | SAR11                                   | Alphaproteobacteria  |
| S116        | ARISA       | SAR116                                  | Alphaproteobacteria  |
| S324        | ARISA       | SAR324                                  | Gammaproteobacteria  |
| MGA         | ARISA       | Marine Group A                          |                      |
| S86         | ARISA       | SAR86                                   | Gammaproteobacteria  |
| Sed         | ARISA       | Sediminibacterium                       | Sphingobacteria      |
| Shw         | ARISA       | Shewanella                              | Gammaproteobacteria  |
| SPM         | ARISA       | SPOTSMAY03-890m3                        | Gammaproteobacteria  |

| <i>Code</i> | <i>Type</i> | <i>Parameter</i>                                    | <i>Taxonomy Note</i> |
|-------------|-------------|-----------------------------------------------------|----------------------|
| Sva         | ARISA       | Sva0996                                             | Actinobacteria       |
| Thb         | ARISA       | Thiobacillus                                        | Betaproteobacteria   |
| Tht         | ARISA       | Thiothrix                                           | Gammaproteobacteria  |
| Tri         | ARISA       | Trichodesmium                                       | Cyanobacteria        |
| Z405        | ARISA       | ZD0405                                              | Gammaproteobacteria  |
| Z417        | ARISA       | ZD0417                                              | Gammaproteobacteria  |
| AmoA        | Env         | ammonia monooxygenase gene                          |                      |
| AWP         | Env         | Average Wave Period                                 |                      |
| AW          | Env         | Average Wind Speed                                  |                      |
| Bact        | Env         | Bacterial Abundance                                 |                      |
| bc.shift    | Env         | Bray Curtis Rate of Community Change                |                      |
| BeamA       | Env         | Beam Attenuation                                    |                      |
| BeamT       | Env         | Beam Transmission                                   |                      |
| CDOM        | Env         | Colored Dissolved Organic Matter                    |                      |
| ChlAb       | Env         | Chlorophyll A (Bottle)                              |                      |
| ChlAm       | Env         | Chlorophyll A (Monthly Satellite Estimate)          |                      |
| ChlA8       | Env         | Chlorophyll A (8 Day Satellite Estimate)            |                      |
| Curl        | Env         | Wind Stress Curl                                    |                      |
| DL          | Env         | Day Length                                          |                      |
| DDL         | Env         | Day Length Change Per Month                         |                      |
| DosEck      | Env         | Direction of Offshore Component of Eckman Transport |                      |
| eO2         | Env         | Estimated Oxygen Concentration                      |                      |
| eO2p        | Env         | Estimated Oxygen Percent                            |                      |
| Fluor       | Env         | Fluorescence                                        |                      |
| ISI         | Env         | Inverse Simpson biodiversity index                  |                      |
| Leu         | Env         | Bacterial Productivity (Leucine)                    |                      |
| MEI         | Env         | Multivariate El-Niño Southern Oscillation Index     |                      |
| MLD         | Env         | Mixed Layer Depth                                   |                      |
| NO2         | Env         | Nitrite Concentration                               |                      |
| NO3         | Env         | Nitrate Concentration                               |                      |
| Nwind       | Env         | Northward Wind Vector                               |                      |
| O2          | Env         | Oxygen Concentration (Bottle + CTD)                 |                      |
| PAR         | Env         | Photo synthetically active radiation                |                      |
| J           | Env         | Pielou's Evenness Index                             |                      |
| PO4         | Env         | Phosphate Concentration                             |                      |
| POC         | Env         | Particulate Organic Carbon (Satellite)              |                      |
| PRCP        | Env         | Precipitation                                       |                      |
| PRCPcat     | Env         | Precipitation Category                              |                      |
| ProdM       | Env         | Primary Productivity Satellite Estimate (Monthly)   |                      |
| Prod8       | Env         | Primary Productivity Satellite Estimate (8 Day)     |                      |
| P*          | Env         | Excess phosphate                                    |                      |
| S           | Env         | Richness (OTUs with > 0.1% Abundance)               |                      |

| <i>Code</i> | <i>Type</i> | <i>Parameter</i>                                       | <i>Taxonomy Note</i> |
|-------------|-------------|--------------------------------------------------------|----------------------|
| Sal         | Env         | Salinity                                               |                      |
| SalCTD      | Env         | Salinity (CTD)                                         |                      |
| ST          | Env         | Seawater density                                       |                      |
| SiO3        | Env         | Silicate Concentration                                 |                      |
| SSHD        | Env         | Sea Surface Height Differential                        |                      |
| st.shift    | Env         | Change in Salinity or Temperature (Euclidean Distance) |                      |
| Svd         | Env         | Sverdrup Transport                                     |                      |
| Temp        | Env         | Temperature                                            |                      |
| TempMin     | Env         | Minimum Daily Air Temperature                          |                      |
| Tdr         | Env         | Bacterial Productivity (Thymidine)                     |                      |
| TOLeu       | Env         | Bacterial Turnover Time (Leucine)                      |                      |
| TOTdr       | Env         | Bacterial Turnover Time (Thymidine)                    |                      |
| Upw         | Env         | Upwelling                                              |                      |
| VBR         | Env         | Virus to Bacteria Ratio                                |                      |
| Vir         | Env         | Viral Abundance                                        |                      |
| WavH        | Env         | Mean Wave Height (day of sampling)                     |                      |
| WinG        | Env         | Maximum 2 minute wind speed gust                       |                      |

Table S1. Description of nodes seen in networks. Node type indicates whether nodes are bacterial OTUs (ARISA) or environmental or biotic parameters (Env). Code is the abbreviation seen in the networks themselves. ARISA OTU codes are always followed in the networks by ITS length. Parameters describe taxonomy of OTUs and environmental parameters. Taxonomy note provides phylum information to OTUs that are defined at a finer than phylum taxonomic resolution.



|                      | Variable/Formula  | AllvAll        | 5m-<br>DCM    | 5m-<br>150m   | 5m-<br>500m   | 5m-<br>890m   | DCM-<br>150m  | DCM-<br>500m  | DCM-<br>890m   | 150m-<br>500m | 150m-<br>890m | 500m-<br>890m |
|----------------------|-------------------|----------------|---------------|---------------|---------------|---------------|---------------|---------------|----------------|---------------|---------------|---------------|
| Nodes                | N                 | 446            | 165           | 164           | 157           | 141           | 163           | 168           | 153            | 160           | 144           | 148           |
| Edges                | E                 | 1339           | 292           | 259           | 225           | 246           | 239           | 253           | 314            | 261           | 274           | 311           |
| Within Depth Nodes   | Ni                | 342            | 139           | 143           | 142           | 122           | 146           | 145           | 125            | 149           | 129           | 128           |
| Within Depth Edges   | Ei                | 445            | 161           | 176           | 172           | 179           | 175           | 171           | 178            | 186           | 193           | 189           |
| Cross Depth Edges    | Eo                | 894            | 131           | 83            | 53            | 67            | 64            | 82            | 136            | 75            | 81            | 122           |
| Within Depth Density | Ei/Ei_Max         | 4.6%           | 5.7%          | 5.9%          | 5.9%          | 6.3%          | 3.9%          | 3.8%          | 4.0%           | 4.0%          | 4.2%          | 4.0%          |
| Cross Depth Density  | Eo/Eo_max         | 1.1%           | 2.1%          | 1.2%          | 0.8%          | 1.0%          | 0.7%          | 0.9%          | 1.6%           | 0.8%          | 0.9%          | 1.4%          |
| Density Ratio        | (Ei/EiM)/(Eo/EoM) | 3.38           | 1.58          | 2.84          | 4.36          | 4.62          | 4.53          | 3.47          | 2.77           | 4.31          | 5.16          | 3.38          |
| Upward               | U                 | 50<br>(5.6%)   | 3<br>(2.3%)   | 5<br>(6.0%)   | 6<br>(11.3%)  | 7<br>(10.4%)  | 3<br>(4.7%)   | 3<br>(3.7%)   | 7<br>(5.1%)    | 2<br>(2.7%)   | 2<br>(2.5%)   | 12<br>(9.8%)  |
| Unlagged             | F                 | 280<br>(31.3%) | 75<br>(57.3%) | 15<br>(18.1%) | 17<br>(32.1%) | 11<br>(16.4%) | 20<br>(31.3%) | 17<br>(20.7%) | 24<br>(17.6%)  | 24<br>(32.0%) | 36<br>(44.4%) | 41<br>(33.6%) |
| Downward             | D                 | 564<br>(63.1%) | 53<br>(40.5%) | 63<br>(75.9%) | 30<br>(56.6%) | 49<br>(73.1%) | 41<br>(64.1%) | 62<br>(75.6%) | 105<br>(77.2%) | 49<br>(65.3%) | 43<br>(53.1%) | 69<br>(56.6%) |

Table S2. Summary Statistics for networks that examine cross correlations between bacteria at different depths. This table complements Table 1 and treats *only positive interactions* between variables, rather than both positive and negative interactions. Note that 58% of the edges in the AllvAll network represent positive correlations, which are addressed here. The AllvAll column reflects the network shown in Figure 2. The other columns reflect the nodes within and connecting pairs of depths. Nodes (N) are the number of bacterial OTUs at a specific depth that occur at least 25 times in the data set connected by at least one edge (correlation) in the specified network. Edges (E) are the total number of Spearman correlations with  $R > 0.55$  in that network. Within Depth Nodes (Ni) are the nodes in these networks that are connected by at least one edge to another node at that same depth. Within depth edges (Ei) are those edges that connect pairs of nodes from the same depth. Cross Depth Edges (Eo) are those edges that connect two nodes from different depths. Within Depth Density, reflects the probability that a pair of nodes from the same depth are connected by an edge; it is the quotient of the number of edges found connecting nodes that are from the same depth, divided by the maximum number of edges that could possibly connect nodes of the same depth in that network. Cross Depth Density (Eo/Eo\_max) reflects the probability that two nodes from different depths are connected by an edge; it is the total number of edges connecting nodes from different depths, compared to the number of possible edges that could connect nodes from those depths. The density ratio (ei/eim)/(eo/eom), reflects how much likelier two nodes are to be connected if they are from the same depth, than if they are from different depths; it is the quotient of the Within Depth Density and the Cross Depth Density of a network. Uphill (U) is the number of time lagged edges that connect pairs of nodes from different depths such that changes in the node at the deeper depth precede changes in the done at the shallower depth. Unlagged (F) is the number of non time lagged edges that connect pairs of nodes from different depths. Downhill is the number of time lagged edges that connect pairs of nodes from different depths such that the changes in the shallower node precede correlated changes in the deeper node.

|                  | 5m   | DCM   | 150m | 500m | 890m | AllvAll |
|------------------|------|-------|------|------|------|---------|
| Nodes (N)        | 68   | 71    | 75   | 74   | 54   | 446     |
| Edges (E)        | 81   | 80    | 95   | 91   | 98   | 1339    |
| Cl               | 0.28 | 0.33  | 0.26 | 0.21 | 0.38 | 0.18    |
| L                | 2.07 | 1.85  | 2.08 | 1.63 | 1.75 | 3.82    |
| Cl_r             | 0.03 | 0.03  | 0.03 | 0.03 | 0.07 | 0.01    |
| L_r              | 4.37 | 4.60  | 4.29 | 4.38 | 3.11 | 3.60    |
| Cl/Cl_R          | 8.79 | 10.20 | 9.02 | 7.12 | 5.79 | 13.67   |
| L/L_R            | 0.47 | 0.40  | 0.48 | 0.37 | 0.56 | 1.06    |
| Density          | 3.6% | 3.2%  | 3.4% | 3.4% | 6.8% | 1.3%    |
| Outgoing Density | 1.6% | 1.1%  | 0.9% | 1.2% | 1.0% | NA      |
| Density Ratio    | 2.19 | 2.98  | 3.85 | 2.84 | 7.09 | NA      |

Table S3. Topological statistics for networks of bacteria at each depth (Figure 1), and for a network of OTUs at all depths (Figure 2) in which *only positive correlations* were considered. This complements Table 2 which shows statistics for networks connected by both positive and negative nodes and Figure S2 which visually depicts the described networks. These networks include only nodes for bacteria that are present at >0.01% abundance greater than 25 times and edges that have a possibly time lagged, global, absolute Spearman R value of greater than 0.5. Parameters are as described in Table 1. Permutation tests suggest that clustering and path length coefficients are statistically significantly different than those for random networks ( $P < 0.001$ ) Similar patterns can be seen as in Table 1, though the density ratio is much higher at 890m when only positive edges are considered, than it is in Table 1 where negative edges are also considered.
